# Supplementary material for: π-Excess aromatic σ2-P ligands: synthesis and structure of an unprecedented μ2-P-1,3-benzazaphosphole bridged tetranuclear copper(i) acetate complex
Source: Royal Society of Chemistry journal article supplement (doi:10.1039/c4dt03072a), 2014-11-19
Supplement: c4dt03072a1.pdf [file c4dt03072a1.pdf]

## Electronic supplementary information

### $\pi$ -Excess aromatic $\sigma^2$ -P ligands: Synthesis and structure of an unprecedented $\mu^2$ -P-1,3-benzazaphosphole bridged tetranuclear copper(I) acetate complex

Mohammed Ghalib,<sup>a</sup> László Könczöl,<sup>b</sup> László Nyulászi,<sup>b\*</sup> Gottfried J. Palm,<sup>c</sup> Carola Schulzke,<sup>d\*</sup> and Joachim W. Heinicke<sup>a\*</sup>

<sup>a</sup> Institut für Biochemie (Anorganische und Bioanorganische Chemie), Ernst-Moritz-Arndt-Universität Greifswald, Felix-Hausdorff-Str. 4, 17487 Greifswald (Germany).

*Corresponding author:* Fax: +49 3834864377, E-mail: [heinicke@uni-greifswald.de](mailto:heinicke@uni-greifswald.de)

<sup>b</sup> Department of Inorganic and Analytical Chemistry, Budapest University of Technology and Economics (Hungary)

<sup>c</sup> Institut für Biochemie (Molekulare Strukturbiologie), Ernst-Moritz-Arndt-Universität Greifswald (Germany)

<sup>d</sup> Institut für Biochemie (Bioanorganische Chemie), Ernst-Moritz-Arndt-Universität Greifswald (Germany)

## Content

1. NMR spectra of complex 1 and VT NMR spectra of  $(npBAP)_xCuOAc$ .
2. Tables with atomic coordinates, bond lengths and angles, and anisotropic displacement parameters of complex 1.

## 1. NMR spectra of complex 1.

Figure S1.  $^{31}\text{P}$  NMR spectrum of **1** in  $\text{CD}_2\text{Cl}_2$ .

|                        |                                                                                                         |                   |          |                                   |                    |                        |        |
|------------------------|---------------------------------------------------------------------------------------------------------|-------------------|----------|-----------------------------------|--------------------|------------------------|--------|
| Acquisition Time (sec) | 0.3277                                                                                                  |                   |          |                                   |                    |                        |        |
| Comment                | Prof.Heinicke:1074NgDCM 31P{1H}-Spektrum Loesungsmittel: CD2Cl2 Ref.: extern, H3PO4 = 0.0 ppm (+/- 0.3) |                   |          | EMAU Greifswald - Avance II - 300 |                    |                        |        |
| Date                   | 26 Mar 2014 10:57:20                                                                                    | Date Stamp        |          | File Name                         |                    |                        |        |
| Frequency (MHz)        | 121.49                                                                                                  | Nucleus           | 31P      | Number of Transients              | 128                | Origin                 | spect  |
| Original Points Count  | 16384                                                                                                   | Owner             | nmr      | Points Count                      | 32768              | Pulse Sequence         | zgpg30 |
| Receiver Gain          | 23100.00                                                                                                | SW(cyclical) (Hz) | 50000.00 | Solvent                           | DICHLOROMETHANE-d2 |                        |        |
| Spectrum Offset (Hz)   | 499.9960                                                                                                | Spectrum Type     | STANDARD | Sweep Width (Hz)                  | 49998.47           | Temperature (degree C) | 27.3   |

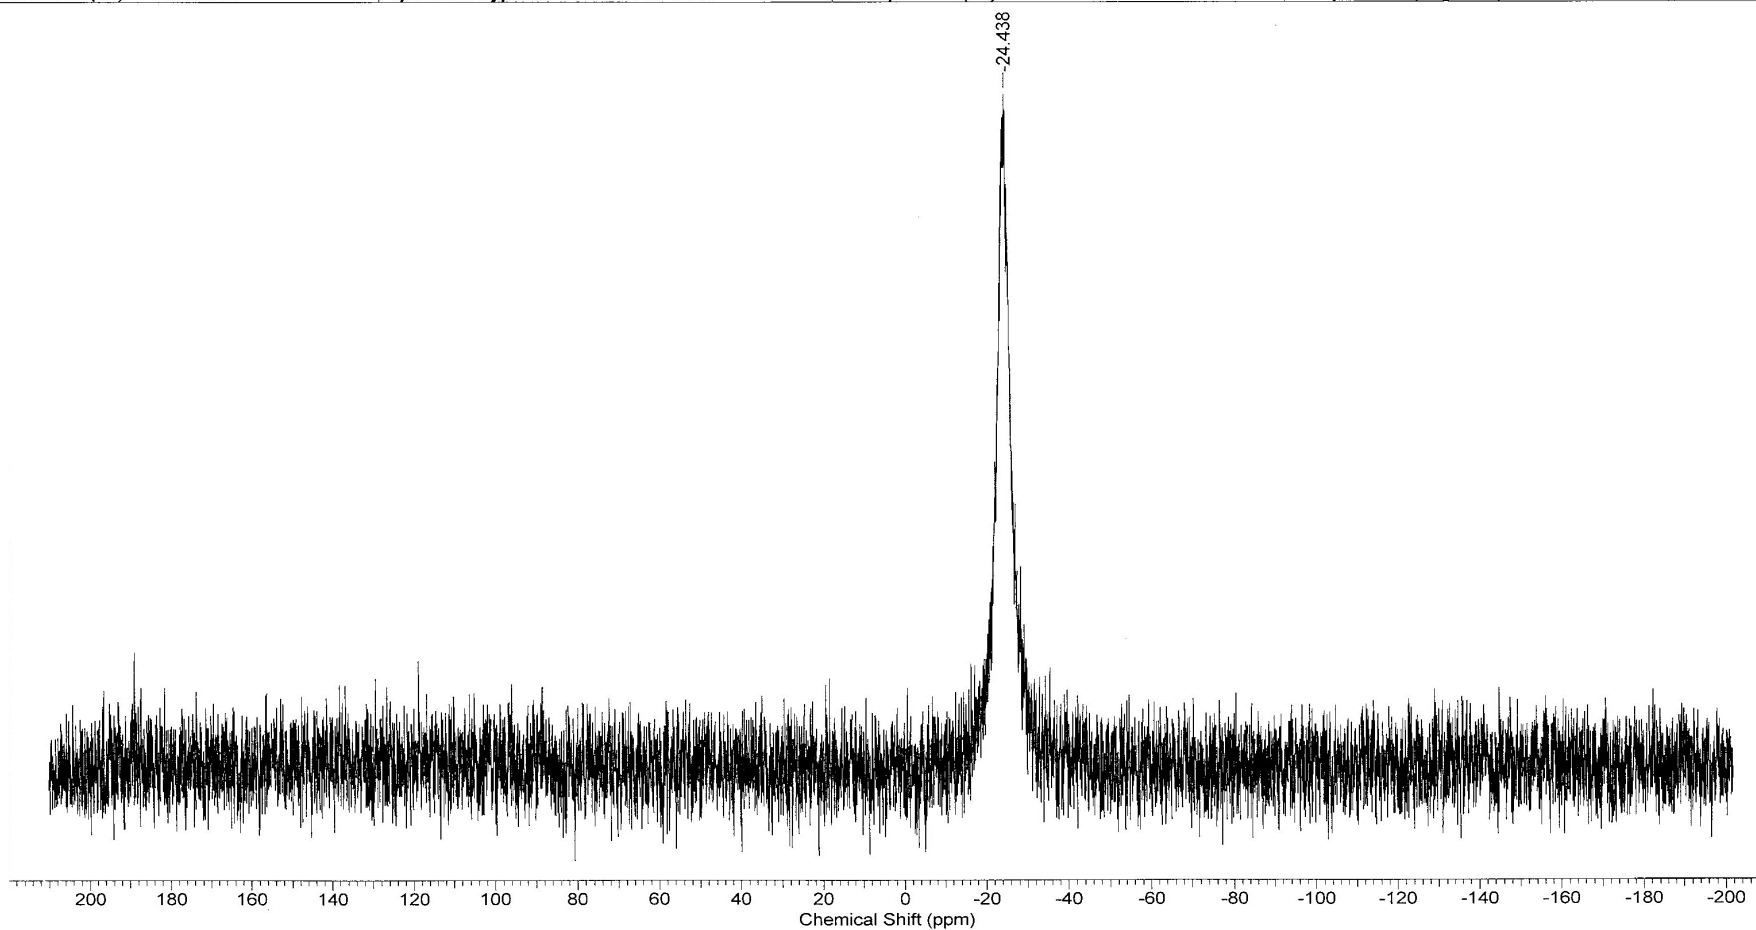

Figure S2.  $^{13}\text{C}$  NMR spectrum of **1** in  $\text{CD}_2\text{Cl}_2$ .

|                        |                      |                      |                                                                                                                      |                        |                       |                       |          |
|------------------------|----------------------|----------------------|----------------------------------------------------------------------------------------------------------------------|------------------------|-----------------------|-----------------------|----------|
| Acquisition Time (sec) | 0.7537               | Comment              | Heinicke: 1074NgDCM $^{13}\text{C}\{^1\text{H}\}$ -NMR-Spektrum LM: $\text{CD}_2\text{Cl}_2$ Referenz: LM = 53,8 ppm |                        | EMAU, AVANCE II - 300 |                       |          |
| Date                   | 27 Mar 2014 12:35:28 | Date Stamp           |                                                                                                                      |                        |                       |                       |          |
| File Name              |                      |                      |                                                                                                                      |                        | Frequency (MHz)       | 75.47                 |          |
| Nucleus                | $^{13}\text{C}$      | Number of Transients | 1228                                                                                                                 | Origin                 | spect                 | Original Points Count | 16384    |
| Owner                  | nmr                  | Points Count         | 16384                                                                                                                | Pulse Sequence         | zgpg30                | Receiver Gain         | 32800.00 |
| SW(cyclical) (Hz)      | 21739.13             | Solvent              | DICHLOROMETHANE-d2                                                                                                   |                        | Spectrum Offset (Hz)  | 8398.3018             |          |
| Spectrum Type          | STANDARD             | Sweep Width (Hz)     | 21737.80                                                                                                             | Temperature (degree C) | 26.200                |                       |          |

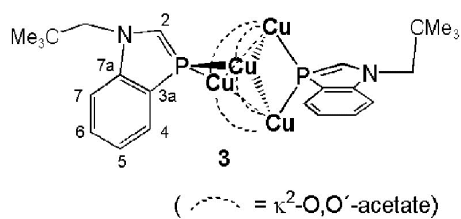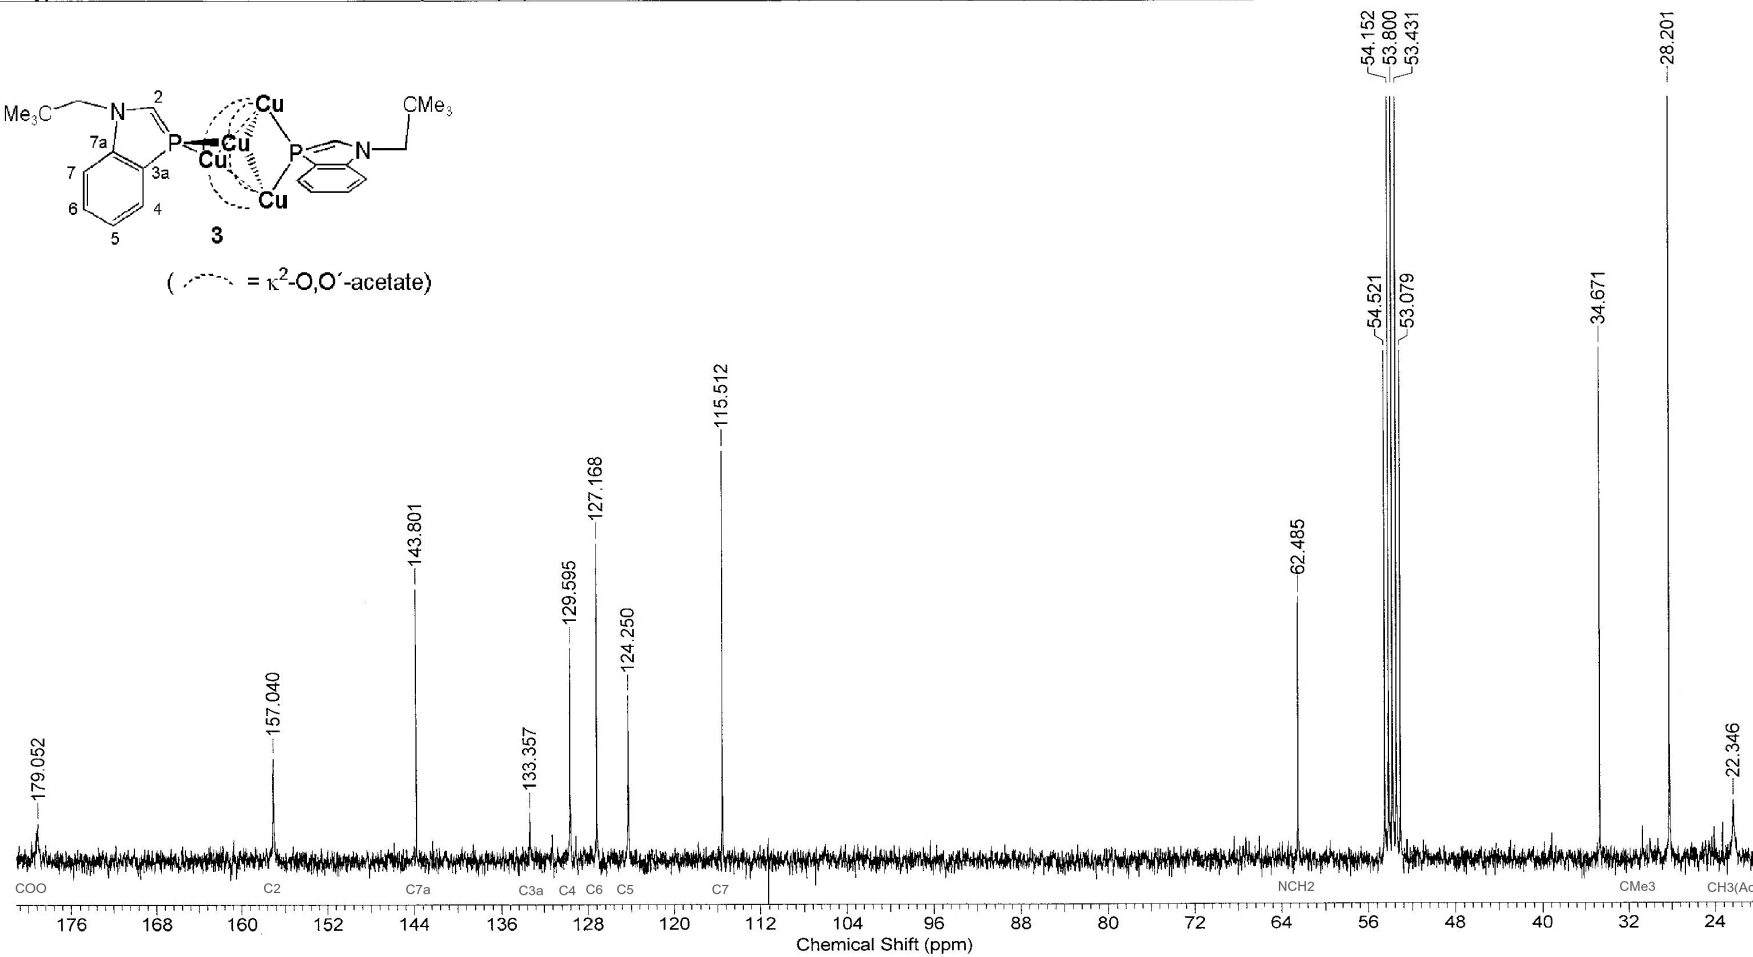

**Figure S3.** Temperature-dependent  $^{31}\text{P}$  NMR spectra of kinetically unstable  $(\text{npBAP})_x\text{CuOAc}$  complexes, obtained from npBAP and CuOAc (molar ratio 2:1) in THF at 20-22 °C (3 d) after separation from insoluble **1**; measurement in  $\text{CD}_2\text{Cl}_2$  solution.

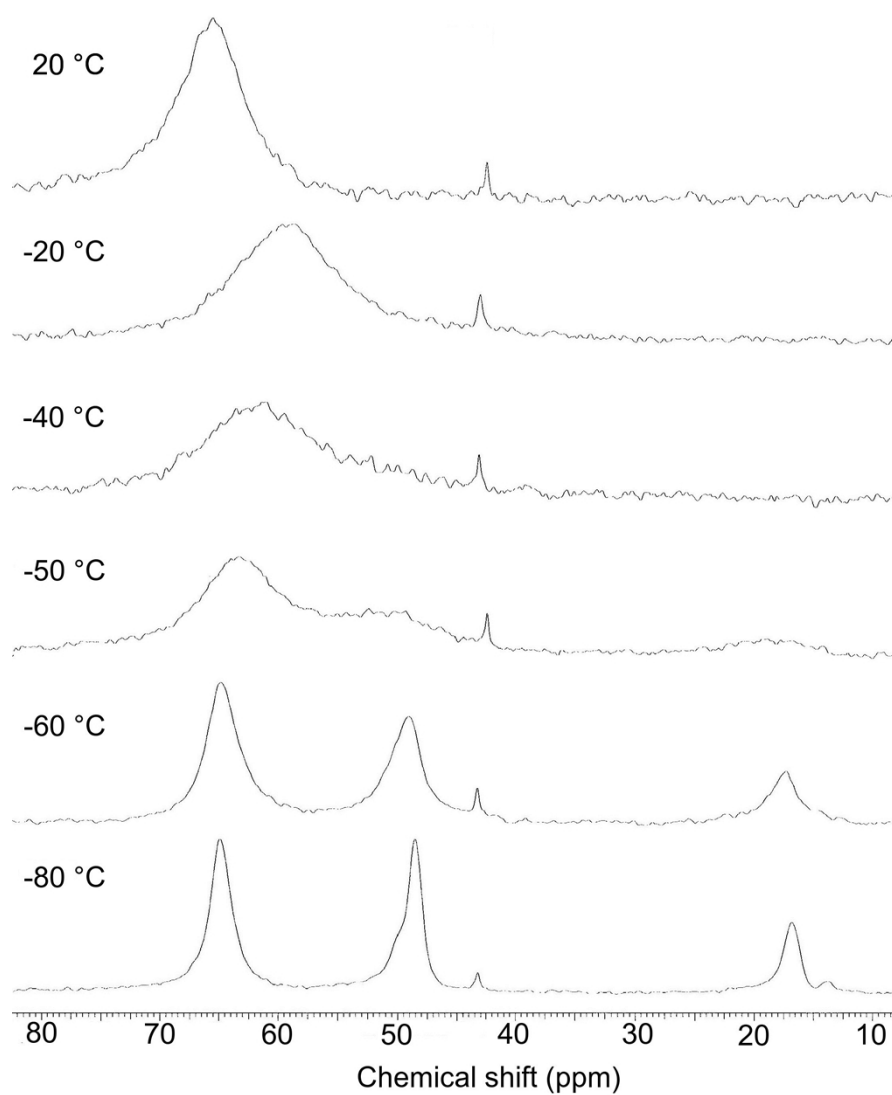

**Figure S4.** Temperature-dependent  $^1\text{H}$  NMR spectra of kinetically unstable  $(\text{npBAP})_x\text{CuOAc}$  complexes, obtained from npBAP and CuOAc (molar ratio 2:1) in THF at 20–22 °C (3 d) after separation from insoluble **1**; measurement in  $\text{CD}_2\text{Cl}_2$  solution, average  $x \approx 2.5$  at 23 °C.

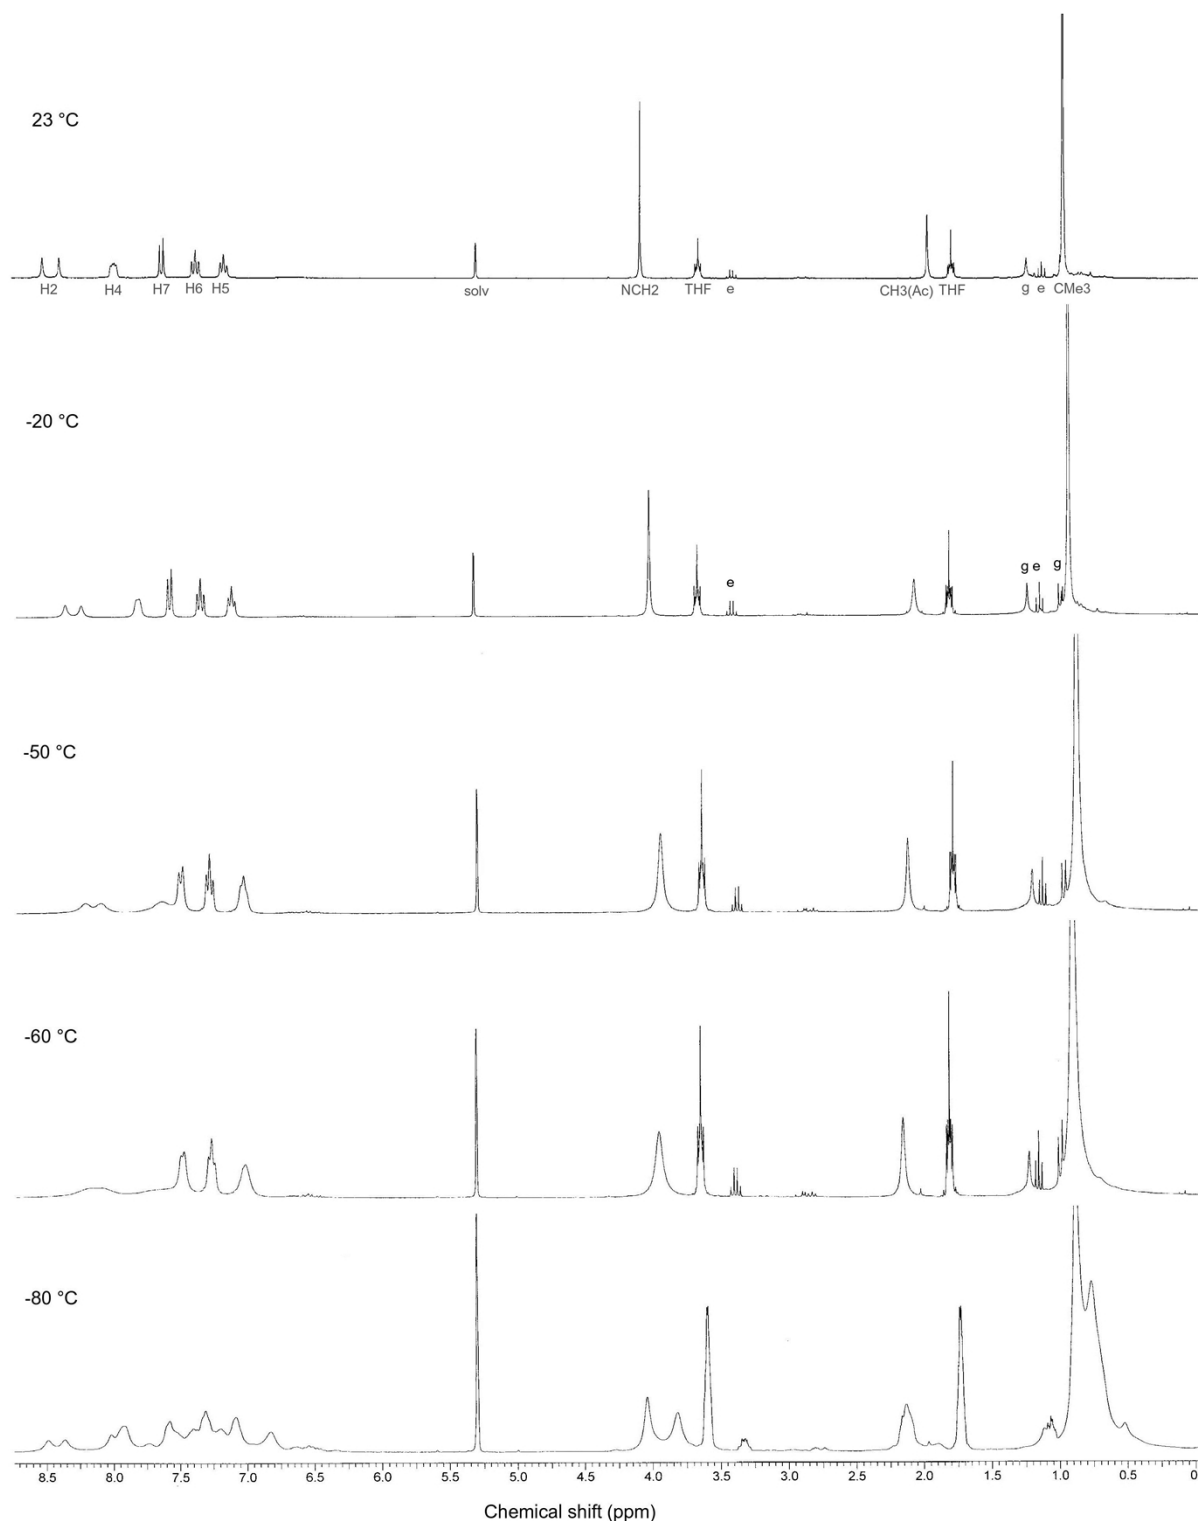

(e, g – signals of minor amounts of diethyl ether and hydrocarbon grease in the filtrate)

**2. Tables with atomics coordinates, bond lengths and angles, and anisotropic displacement parameters of 1.**

Table S1. Atomic coordinates ( $\times 10^4$ ) and equivalent isotropic displacement parameters ( $\text{\AA}^2 \times 10^3$ ) of 1.  $U(\text{eq})$  is defined as one third of the trace of the orthogonalized  $U_{ij}$  tensor.

|       | x       | y       | z       | $U(\text{eq})$ |
|-------|---------|---------|---------|----------------|
| Cu(1) | 7097(1) | 3713(1) | 2565(1) | 25(1)          |
| Cu(2) | 5276(1) | 5688(1) | 2777(1) | 22(1)          |
| Cu(3) | 3679(1) | 4915(1) | 2116(1) | 25(1)          |
| Cu(4) | 4900(1) | 2832(1) | 2927(1) | 25(1)          |
| P(1)  | 5736(1) | 4481(1) | 1614(1) | 23(1)          |
| P(2)  | 4801(1) | 4194(1) | 3544(1) | 19(1)          |
| O(1)  | 8408(2) | 4507(2) | 2757(1) | 32(1)          |
| O(2)  | 6827(2) | 6336(2) | 2688(1) | 28(1)          |
| O(3)  | 3788(2) | 7273(2) | 2523(1) | 33(1)          |
| O(4)  | 2395(2) | 6581(2) | 2046(1) | 34(1)          |
| O(5)  | 2262(2) | 4190(2) | 2022(1) | 29(1)          |
| O(6)  | 3524(2) | 2304(2) | 2556(1) | 34(1)          |
| O(7)  | 6430(2) | 1258(2) | 3057(1) | 35(1)          |
| O(8)  | 8144(2) | 2023(2) | 3008(1) | 33(1)          |
| N(1)  | 6799(2) | 3850(2) | 457(1)  | 21(1)          |
| N(2)  | 5254(2) | 3369(2) | 4897(1) | 18(1)          |
| C(1)  | 6006(2) | 5616(2) | 896(1)  | 21(1)          |
| C(2)  | 5685(3) | 6868(2) | 838(1)  | 27(1)          |
| C(3)  | 5894(3) | 7585(2) | 199(2)  | 32(1)          |
| C(4)  | 6414(3) | 7069(2) | -379(2) | 32(1)          |
| C(5)  | 6768(3) | 5833(2) | -331(1) | 25(1)          |
| C(6)  | 6554(2) | 5113(2) | 315(1)  | 21(1)          |
| C(7)  | 6384(3) | 3409(2) | 1100(1) | 23(1)          |
| C(8)  | 7506(3) | 3080(2) | -36(1)  | 25(1)          |
| C(9)  | 9096(3) | 2534(2) | 62(2)   | 30(1)          |
| C(10) | 9752(3) | 3531(3) | -60(2)  | 47(1)          |
| C(11) | 9613(4) | 1781(3) | -495(2) | 49(1)          |
| C(12) | 9482(3) | 1713(3) | 801(2)  | 40(1)          |
| C(13) | 3443(2) | 4712(2) | 4141(1) | 19(1)          |
| C(14) | 2107(3) | 5557(2) | 4000(1) | 25(1)          |
| C(15) | 1252(3) | 5828(2) | 4559(2) | 29(1)          |
| C(16) | 1697(3) | 5275(2) | 5260(2) | 30(1)          |
| C(17) | 3014(3) | 4450(2) | 5413(1) | 25(1)          |
| C(18) | 3885(2) | 4167(2) | 4845(1) | 18(1)          |
| C(19) | 5868(2) | 3323(2) | 4270(1) | 19(1)          |
| C(20) | 5963(3) | 2606(2) | 5564(1) | 21(1)          |
| C(21) | 5812(2) | 1329(2) | 5772(1) | 21(1)          |
| C(22) | 4310(3) | 1402(2) | 5941(2) | 30(1)          |
| C(23) | 6710(3) | 664(2)  | 6437(2) | 31(1)          |
| C(24) | 6342(3) | 641(2)  | 5183(2) | 29(1)          |
| C(25) | 8060(3) | 5640(2) | 2707(2) | 28(1)          |

|       |         |         |         |       |
|-------|---------|---------|---------|-------|
| C(26) | 9205(4) | 6169(3) | 2690(3) | 51(1) |
| C(27) | 2669(3) | 7397(2) | 2247(2) | 29(1) |
| C(28) | 1544(4) | 8626(3) | 2145(2) | 49(1) |
| C(29) | 2468(3) | 3067(2) | 2220(1) | 25(1) |
| C(30) | 1367(3) | 2613(3) | 2027(2) | 35(1) |
| C(31) | 7671(3) | 1156(2) | 3131(2) | 28(1) |
| C(32) | 8664(3) | -117(2) | 3401(2) | 40(1) |
| C(33) | 5678(5) | 9520(3) | 2013(2) | 52(1) |
| CI(1) | 7165(2) | 9704(2) | 1575(1) | 90(1) |
| CI(2) | 4319(1) | 9853(1) | 1405(1) | 64(1) |
| C(34) | 516(3)  | 2217(2) | 3881(2) | 33(1) |
| CI(3) | -197(1) | 1484(1) | 4628(1) | 41(1) |
| CI(4) | 1659(1) | 2870(1) | 4116(1) | 45(1) |

---

Table S2. Bond lengths [Å] and angles [deg] of **1**.

|             |            |                  |            |
|-------------|------------|------------------|------------|
| Cu(1)-O(8)  | 1.955(2)   | C(21)-C(24)      | 1.528(4)   |
| Cu(1)-O(1)  | 1.988(2)   | C(21)-C(22)      | 1.529(4)   |
| Cu(1)-P(1)  | 2.2115(11) | C(25)-C(26)      | 1.505(4)   |
| Cu(2)-O(3)  | 1.970(2)   | C(27)-C(28)      | 1.511(4)   |
| Cu(2)-O(2)  | 1.9714(18) | C(29)-C(30)      | 1.509(3)   |
| Cu(2)-P(2)  | 2.2068(10) | C(31)-C(32)      | 1.511(4)   |
| Cu(3)-O(4)  | 1.963(2)   | C(33)-Cl(1)      | 1.746(4)   |
| Cu(3)-O(5)  | 1.9631(19) | C(33)-Cl(2)      | 1.768(5)   |
| Cu(3)-P(1)  | 2.2101(10) | C(34)-Cl(4)      | 1.747(3)   |
| Cu(4)-O(6)  | 1.966(2)   | C(34)-Cl(3)      | 1.756(3)   |
| Cu(4)-O(7)  | 1.977(2)   |                  |            |
| Cu(4)-P(2)  | 2.2131(9)  | O(8)-Cu(1)-O(1)  | 98.92(9)   |
| P(1)-C(7)   | 1.738(3)   | O(8)-Cu(1)-P(1)  | 130.58(7)  |
| P(1)-C(1)   | 1.778(2)   | O(1)-Cu(1)-P(1)  | 121.06(7)  |
| P(2)-C(19)  | 1.738(3)   | O(3)-Cu(2)-O(2)  | 96.80(8)   |
| P(2)-C(13)  | 1.788(2)   | O(3)-Cu(2)-P(2)  | 117.93(7)  |
| O(1)-C(25)  | 1.260(3)   | O(2)-Cu(2)-P(2)  | 133.30(6)  |
| O(2)-C(25)  | 1.256(3)   | O(4)-Cu(3)-O(5)  | 96.08(9)   |
| O(3)-C(27)  | 1.249(3)   | O(4)-Cu(3)-P(1)  | 123.74(7)  |
| O(4)-C(27)  | 1.251(3)   | O(5)-Cu(3)-P(1)  | 125.28(7)  |
| O(5)-C(29)  | 1.253(3)   | O(6)-Cu(4)-O(7)  | 96.94(9)   |
| O(6)-C(29)  | 1.258(3)   | O(6)-Cu(4)-P(2)  | 134.87(7)  |
| O(7)-C(31)  | 1.252(3)   | O(7)-Cu(4)-P(2)  | 121.76(7)  |
| O(8)-C(31)  | 1.254(3)   | C(7)-P(1)-C(1)   | 89.34(11)  |
| N(1)-C(7)   | 1.335(3)   | C(7)-P(1)-Cu(3)  | 125.65(9)  |
| N(1)-C(6)   | 1.406(3)   | C(1)-P(1)-Cu(3)  | 116.99(9)  |
| N(1)-C(8)   | 1.468(3)   | C(7)-P(1)-Cu(1)  | 103.54(9)  |
| N(2)-C(19)  | 1.333(3)   | C(1)-P(1)-Cu(1)  | 121.99(9)  |
| N(2)-C(18)  | 1.401(3)   | Cu(3)-P(1)-Cu(1) | 100.50(4)  |
| N(2)-C(20)  | 1.471(3)   | C(19)-P(2)-C(13) | 89.08(11)  |
| C(1)-C(6)   | 1.398(3)   | C(19)-P(2)-Cu(2) | 122.14(8)  |
| C(1)-C(2)   | 1.400(3)   | C(13)-P(2)-Cu(2) | 113.51(8)  |
| C(2)-C(3)   | 1.380(3)   | C(19)-P(2)-Cu(4) | 102.70(8)  |
| C(3)-C(4)   | 1.395(4)   | C(13)-P(2)-Cu(4) | 124.66(8)  |
| C(4)-C(5)   | 1.380(4)   | Cu(2)-P(2)-Cu(4) | 105.06(3)  |
| C(5)-C(6)   | 1.392(3)   | C(25)-O(1)-Cu(1) | 122.56(18) |
| C(8)-C(9)   | 1.545(4)   | C(25)-O(2)-Cu(2) | 120.95(16) |
| C(9)-C(10)  | 1.522(4)   | C(27)-O(3)-Cu(2) | 122.63(17) |
| C(9)-C(11)  | 1.523(4)   | C(27)-O(4)-Cu(3) | 124.52(19) |
| C(9)-C(12)  | 1.525(4)   | C(29)-O(5)-Cu(3) | 122.48(18) |
| C(13)-C(14) | 1.400(3)   | C(29)-O(6)-Cu(4) | 121.12(16) |
| C(13)-C(18) | 1.402(3)   | C(31)-O(7)-Cu(4) | 123.32(16) |
| C(14)-C(15) | 1.375(4)   | C(31)-O(8)-Cu(1) | 124.78(18) |
| C(15)-C(16) | 1.398(4)   | C(7)-N(1)-C(6)   | 113.1(2)   |
| C(16)-C(17) | 1.381(4)   | C(7)-N(1)-C(8)   | 123.2(2)   |
| C(17)-C(18) | 1.401(3)   | C(6)-N(1)-C(8)   | 123.6(2)   |
| C(20)-C(21) | 1.543(3)   | C(19)-N(2)-C(18) | 113.46(19) |
| C(21)-C(23) | 1.527(3)   | C(19)-N(2)-C(20) | 121.8(2)   |



|                   |            |                   |            |
|-------------------|------------|-------------------|------------|
| C(18)-N(2)-C(20)  | 124.73(19) | C(17)-C(18)-C(13) | 121.2(2)   |
| C(6)-C(1)-C(2)    | 119.8(2)   | N(2)-C(18)-C(13)  | 112.6(2)   |
| C(6)-C(1)-P(1)    | 110.49(16) | N(2)-C(19)-P(2)   | 114.40(17) |
| C(2)-C(1)-P(1)    | 129.65(19) | N(2)-C(20)-C(21)  | 114.13(18) |
| C(3)-C(2)-C(1)    | 118.8(2)   | C(23)-C(21)-C(24) | 109.6(2)   |
| C(2)-C(3)-C(4)    | 120.5(2)   | C(23)-C(21)-C(22) | 109.5(2)   |
| C(5)-C(4)-C(3)    | 121.8(2)   | C(24)-C(21)-C(22) | 109.9(2)   |
| C(4)-C(5)-C(6)    | 117.5(2)   | C(23)-C(21)-C(20) | 105.52(19) |
| C(5)-C(6)-C(1)    | 121.6(2)   | C(24)-C(21)-C(20) | 110.78(19) |
| C(5)-C(6)-N(1)    | 125.6(2)   | C(22)-C(21)-C(20) | 111.5(2)   |
| C(1)-C(6)-N(1)    | 112.71(19) | O(2)-C(25)-O(1)   | 124.0(2)   |
| N(1)-C(7)-P(1)    | 114.28(17) | O(2)-C(25)-C(26)  | 118.8(2)   |
| N(1)-C(8)-C(9)    | 114.6(2)   | O(1)-C(25)-C(26)  | 117.2(3)   |
| C(10)-C(9)-C(11)  | 109.3(3)   | O(3)-C(27)-O(4)   | 125.3(2)   |
| C(10)-C(9)-C(12)  | 109.8(3)   | O(3)-C(27)-C(28)  | 118.1(2)   |
| C(11)-C(9)-C(12)  | 109.7(3)   | O(4)-C(27)-C(28)  | 116.6(3)   |
| C(10)-C(9)-C(8)   | 111.2(2)   | O(5)-C(29)-O(6)   | 124.7(2)   |
| C(11)-C(9)-C(8)   | 105.9(2)   | O(5)-C(29)-C(30)  | 116.8(2)   |
| C(12)-C(9)-C(8)   | 110.8(2)   | O(6)-C(29)-C(30)  | 118.4(2)   |
| C(14)-C(13)-C(18) | 119.5(2)   | O(7)-C(31)-O(8)   | 125.3(2)   |
| C(14)-C(13)-P(2)  | 130.10(19) | O(7)-C(31)-C(32)  | 116.8(2)   |
| C(18)-C(13)-P(2)  | 110.33(17) | O(8)-C(31)-C(32)  | 118.0(2)   |
| C(15)-C(14)-C(13) | 119.2(2)   | Cl(1)-C(33)-Cl(2) | 111.3(2)   |
| C(14)-C(15)-C(16) | 121.0(2)   | Cl(4)-C(34)-Cl(3) | 111.96(17) |
| C(17)-C(16)-C(15) | 121.0(2)   |                   |            |
| C(16)-C(17)-C(18) | 118.1(2)   |                   |            |
| C(17)-C(18)-N(2)  | 126.2(2)   |                   |            |

Symmetry transformations used to generate equivalent atoms:

Table S3. Anisotropic displacement parameters ( $\text{\AA}^2 \times 10^3$ ) of **1**. The anisotropic displacement factor exponent takes the form:  $-2 \pi^2 [ h^2 a^{*2} U_{11} + \dots + 2 h k a^* b^* U_{12} ]$

|       | U11   | U22   | U33   | U23   | U13    | U12    |
|-------|-------|-------|-------|-------|--------|--------|
| Cu(1) | 27(1) | 21(1) | 25(1) | -1(1) | -2(1)  | -9(1)  |
| Cu(2) | 20(1) | 20(1) | 24(1) | -1(1) | 1(1)   | -7(1)  |
| Cu(3) | 25(1) | 21(1) | 29(1) | -5(1) | 2(1)   | -9(1)  |
| Cu(4) | 26(1) | 20(1) | 29(1) | -7(1) | -5(1)  | -6(1)  |
| P(1)  | 29(1) | 23(1) | 16(1) | -3(1) | 3(1)   | -11(1) |
| P(2)  | 21(1) | 22(1) | 16(1) | -4(1) | 3(1)   | -9(1)  |
| O(1)  | 26(1) | 25(1) | 45(1) | -2(1) | -3(1)  | -10(1) |
| O(2)  | 25(1) | 25(1) | 34(1) | -5(1) | 2(1)   | -12(1) |
| O(3)  | 28(1) | 23(1) | 43(1) | -9(1) | -8(1)  | -2(1)  |
| O(4)  | 31(1) | 25(1) | 45(1) | -9(1) | -8(1)  | -6(1)  |
| O(5)  | 28(1) | 29(1) | 31(1) | -4(1) | -2(1)  | -12(1) |
| O(6)  | 35(1) | 27(1) | 43(1) | -6(1) | -10(1) | -13(1) |

|       |       |       |       |        |        |        |
|-------|-------|-------|-------|--------|--------|--------|
| O(7)  | 28(1) | 21(1) | 54(1) | -9(1)  | 0(1)   | -6(1)  |
| O(8)  | 29(1) | 22(1) | 42(1) | 0(1)   | -5(1)  | -8(1)  |
| N(1)  | 22(1) | 23(1) | 19(1) | -5(1)  | -1(1)  | -7(1)  |
| N(2)  | 22(1) | 17(1) | 17(1) | -4(1)  | 1(1)   | -9(1)  |
| C(1)  | 23(1) | 21(1) | 17(1) | -1(1)  | 1(1)   | -7(1)  |
| C(2)  | 34(1) | 22(1) | 24(1) | -5(1)  | 5(1)   | -8(1)  |
| C(3)  | 38(1) | 22(1) | 32(1) | -1(1)  | 4(1)   | -9(1)  |
| C(4)  | 34(1) | 31(1) | 25(1) | 4(1)   | 3(1)   | -11(1) |
| C(5)  | 26(1) | 30(1) | 16(1) | -2(1)  | 1(1)   | -7(1)  |
| C(6)  | 20(1) | 24(1) | 16(1) | -2(1)  | -2(1)  | -8(1)  |
| C(7)  | 26(1) | 23(1) | 24(1) | -4(1)  | 0(1)   | -11(1) |
| C(8)  | 27(1) | 28(1) | 24(1) | -12(1) | -1(1)  | -9(1)  |
| C(9)  | 28(1) | 29(1) | 32(1) | -13(1) | 1(1)   | -5(1)  |
| C(10) | 24(1) | 39(2) | 75(3) | -11(2) | 5(2)   | -11(1) |
| C(11) | 46(2) | 49(2) | 45(2) | -25(2) | 6(2)   | 3(1)   |
| C(12) | 37(2) | 36(1) | 41(2) | -11(1) | -8(1)  | -2(1)  |
| C(13) | 21(1) | 19(1) | 21(1) | -6(1)  | 2(1)   | -10(1) |
| C(14) | 24(1) | 23(1) | 28(1) | -4(1)  | 0(1)   | -9(1)  |
| C(15) | 23(1) | 24(1) | 40(1) | -9(1)  | 5(1)   | -7(1)  |
| C(16) | 28(1) | 28(1) | 35(1) | -14(1) | 14(1)  | -9(1)  |
| C(17) | 31(1) | 23(1) | 24(1) | -9(1)  | 7(1)   | -11(1) |
| C(18) | 22(1) | 15(1) | 20(1) | -6(1)  | 2(1)   | -9(1)  |
| C(19) | 19(1) | 19(1) | 22(1) | -5(1)  | 4(1)   | -9(1)  |
| C(20) | 26(1) | 21(1) | 19(1) | -3(1)  | -3(1)  | -11(1) |
| C(21) | 25(1) | 19(1) | 21(1) | -3(1)  | -1(1)  | -10(1) |
| C(22) | 29(1) | 25(1) | 35(1) | -1(1)  | 2(1)   | -15(1) |
| C(23) | 36(1) | 26(1) | 27(1) | 2(1)   | -9(1)  | -9(1)  |
| C(24) | 38(1) | 24(1) | 30(1) | -10(1) | 2(1)   | -13(1) |
| C(25) | 26(1) | 27(1) | 34(1) | -4(1)  | 0(1)   | -15(1) |
| C(26) | 32(2) | 43(2) | 90(3) | -19(2) | 5(2)   | -24(1) |
| C(27) | 29(1) | 23(1) | 31(1) | -8(1)  | -2(1)  | -4(1)  |
| C(28) | 37(2) | 31(1) | 73(3) | -22(2) | -17(2) | 6(1)   |
| C(29) | 26(1) | 31(1) | 22(1) | -10(1) | 3(1)   | -14(1) |
| C(30) | 33(1) | 44(1) | 38(2) | -16(1) | 1(1)   | -22(1) |
| C(31) | 30(1) | 21(1) | 31(1) | -7(1)  | 1(1)   | -5(1)  |
| C(32) | 31(1) | 23(1) | 60(2) | -5(1)  | -5(1)  | -1(1)  |
| C(33) | 74(3) | 43(2) | 42(2) | -9(1)  | 22(2)  | -26(2) |
| Cl(1) | 88(1) | 92(1) | 97(1) | -28(1) | 48(1)  | -42(1) |
| Cl(2) | 88(1) | 33(1) | 60(1) | -1(1)  | -1(1)  | -14(1) |
| C(34) | 38(1) | 26(1) | 36(1) | -4(1)  | 0(1)   | -13(1) |
| Cl(3) | 37(1) | 34(1) | 48(1) | 5(1)   | 0(1)   | -17(1) |
| Cl(4) | 35(1) | 39(1) | 69(1) | -15(1) | 7(1)   | -20(1) |

---
